# Supplementary material for: Consideration of the cloud motion for aircraft-based stereographically derived cloud geometry and cloud top heights
Source: Copernicus journal article supplement (doi:10.5194/amt-2024-19), 2024-02-26
Supplement: Supplementary file [file amt-2024-19-AC2-supplement.pdf]

## Response to RC2 of amt-2024-19

We want to thank the second referee for reviewing our manuscript. The reviewer posed some minor comments which we have addressed as described below:

### Wind correction based on ERA5 reanalysis data

Please, add also *Pcs* in the text.

p. 3, line 90: “of the point on the cloud surface (*Pcs*)”

to Figure 1: In the printed version the clouds are quite faint.

We applied the suggested change in l. 90/91 and enlarged the opacity of the clouds in Fig. 1.

### Validation using measurements from EUREC4A campaign

Figure 2 should be enlarged, it hard to see.

The figure size has been enlarged as suggested.

p.4, line 109: “no significant change” To be more precise, a value should be given here.

We added the median values of the flight legs from the lidar in the suggested sentence: “WALES measurements which are not affected by the cloud movement showed no significant changes in cloud top height during this time with median values of about 745 m on the first leg and 738 m on the second one.”

Figure 3: Could you include the PDF of the WALES measurement, the comparison would be benefit from it.

The WALES PDFs were added to Fig. 3.

### Accuracy estimation using realistic simulated measurements from 3-D radiative transfer simulations

p.7, line 133. Can you add an explanation why the used wind speed in the simulations is chosen lower than the real measurement before?

The wind speed of the simulations was taken as obtained from the LES simulations. The simulations were initialized using data from the EUREC<sup>4</sup>A campaign but afterwards not forced any further. Since we used the second-by-second output from the LES for our radiative transfer simulations, the wind is prescribed by the output, and thus, was not chosen. We changed l. 130f. as following to emphasize that the wind field was obtained from the simulations and was not chosen: “Figure 4 shows the underlying model wind field as obtained

from the LES simulations, indicating wind directions between approximately 140° at low altitudes and 340° at higher altitudes.”

## Conclusion

To the conclusion: It should be mentioned that further studies with more inhomogeneous cloud state should be added. Since the correction will be even more necessary.

To address this comment, we added the following paragraph at the end of the paper:

“While this study is based on observed and simulated shallow cumulus clouds, the performance of the stereographic retrieval including the wind correction should in future also be tested for other cloud types. In particular, the retrieval should also work in more inhomogeneous cloud fields, with cloud tops spanning larger altitude ranges. This will be investigated in the future, using observations of from past and upcoming field campaigns addressing different cloud types as well as corresponding simulated observations.”
